# Supplementary material for: Association Between Social Support and Ambulance Use Among Older People in Japan: An Empirical Cross-sectional Study
Source: Research Square preprint supplement (doi:10.21203/rs.3.rs-3565838/v1), 2023-11-14
Supplement: Supplementary file 1 [file 165b0581c6851abe8a194504.xlsx]

## Sheet: Sheet1
Table２ Binomial logistic regression analysis of the relationship between social support and ambulance call
Variables		Categories	Model 1				Model 2				Model 3
			OR	(95%CI)	P		OR	(95%CI)	P		OR	(95%CI)	P
About people around you who to listen to your complaints
	1	Family members listen to your complaints	0.77	0.67 to 0.88	0		0.77	0.67 to 0.88	0		0.83	0.71 to 0.96	0.01
	2	Neigbors or friends listen to your complaints	0.78	0.70 to 0.86	0		0.89	0.80 to 0.99	0.04		0.97	0.86 to 1.08	0.54
	3	There is no one to listen to your complaints	1.4	1.13 to 1.73	0		1.27	1.02 to 1.58	0.03		1.11	0.88 to 1.39	0.39
About people around you whose complaints you listen to
	1	You listen to your family's complaints	0.76	0.70 to 0.86	0		0.78	0.69 to 0.88	0		0.85	0.75 to 0.98	0.02
	2	You listen to neighbors' or friends' complaints	0.72	0.64 to 0.80	0		0.82	0.73 to 0.91	0		0.9	0.80 to 1.01	0.07
	3	You have no one whose complaints you listen to	1.69	1.41 to 2.02	0		1.48	1.30 to 1.77	0		1.26	1.03 to 1.53	0.02
About pople who take care of you when you fall ill
	1	Family members take care of you	0.64	0.54 to 0.77	0		0.63	0.53 to 0.75	0		0.73	0.60 to 0.90	0
	2	Neighbors or friends take care of you	1.24	1.04 to 1.49	0.02		1.34	1.12 to 1.62	0		1.34	1.10 to 1.63	0
	3	There is no one who takes care of you	1.39	1.13 to 1.72	0		1.44	1.17 to 1.77	0		1.22	0.97 to 1.54	0.09
About people who you take care of when they fall ill
	1	You take care of your family	0.76	0.68 to 0.86	0		0.81	0.72 to 0.91	0		0.81	0.72 to 0.91	0
	2	You take care of neighbors or friends	1.01	0.84 to 1.22	0.92		1.1	0.91 to 1.33	0.33		1.13	0.93 to 1.38	0.22
	3	There is no one who you take care of	1.3	1.16 to 1.47	0		1.22	1.08 to 1.38	0.001		1.15	1.01 to 1.31	0.04
OR: odds ratio; CI: confidence interval
*Model 1: adjusted for social support
*Model 2: Model 1 + adjusted for age and sex
*Model 3: Model 2+ adjusted for health status, marital status, annual equivalent income and years of education
Bold P figure: p<0.05
Table 3 People who did not call an ambulance versus people who did but were not hospitalized
Variables		Categories	Model 1				Model 2				Model 3
			OR	(95%CI)	P		OR	(95%CI)	P		OR	(95%CI)	P
About people around you who to listen to your complaints
	1	Family members listen to your complaints	0.74	0.60 to 0.90	0		0.74	0.61 to 0.91	0		0.76	0.62 to 0.94	0.01
	2	Neigbors or friends listen to your complaints	0.9	0.77 to 1.05	0.16		0.98	0.83 to 1.15	0.78		1.05	0.90 to 1.24	0.57
	3	There is no one to listen to your complaints	1.79	1.34 to 2.38	0		1.74	1.30 to 2.33	0		1.58	1.16 to 2.14	0
About people around you whose complaints you listen to
	1	You listen to your family's complaints	0.72	0.60 to 0.86	0		0.75	0.62 to 0.90	0		0.79	0.65 to 0.96	0.02
	2	You listen to neighbors' or friends' complaints	0.84	0.72 to 0.98	0.03		0.92	0.78 to 1.08	0.28		0.99	0.84 to 1.18	0.94
	3	You have no one whose complaints you listen to	1.54	1.15 to 2.07	0		1.69	1.31 to 2.19	0		1.46	1.11 to 1.91	0.01
About pople who take care of you when you fall ill
	1	Family members take care of you	0.63	0.49 to 0.81	0		0.62	0.48 to 0.80	0		0.7	0.52 to 0.92	0.01
	2	Neighbors or friends take care of you	1.09	0.82 to 1.45	0.54		1.11	0.84 to 1.48	0.47		1.11	0.82 to 1.50	0.49
	3	There is no one who takes care of you	1.54	1.15 to 2.07	0		1.6	1.19 to 2.15	0		1.39	1.01 to 1.92	0.04
About people who you take care of when they fall ill
	1	You take care of your family	0.78	0.66 to 0.92	0.01		0.82	0.69 to 0.98	0.03		0.91	0.75 to 1.10	0.31
	2	You take care of neighbors or friends	0.92	0.69 to 1.23	0.57		0.96	0.71 to 1.28	0.77		0.96	0.71 to 1.31	0.81
	3	There is no one who you take care of	1.27	1.06 to 1.52	0.01		1.2	1.00 to 1.43	0.05		1.1	0.91 to 1.34	0.33
OR: odds ratio; CI: confidence interval
*Model 1: adjusted for social support
*Model 2: Model 1 + adjusted for age and sex
*Model 3: Model 2+ adjusted for health status, marital status, annual equivalent income and years of education
Bold P figure: p<0.05
Binomial logistic regression analysis for people who did not call an ambulance versus people who did but were not hospitalized after ambulance transport
