# Supplementary material for: Association Between Social Support and Ambulance Use Among Older People in Japan: An Empirical Cross-sectional Study
Source: Research Square preprint supplement (doi:10.21203/rs.3.rs-3565838/v1), 2023-11-14
Supplement: Supplementary file 2 [file c9264c03585982b81be29303.xlsx]

## Sheet: Sheet1
Table1 Characteristics of study participants
	Total			People who did not call an ambulance			People who called ambulance, but were not hospitalized			People who called an ambulance and were hospitalized
	n	%		n	%		n	%		n	%
Gender	21471
Female	11191	100		10499	93.8		341	3.1		350	3.1
Male	10280	100		9446	91.9		342	3.3		493	4.8
Age (years)	21471
65~69	5155	100		4922	95.5		117	2.3		116	2.3
70~74	6383	100		6016	94.3		164	2.6		203	3.2
75~79	5162	100		4768	92.4		175	3.4		219	4.2
80~84	3135	100		2820	90		131	4.2		184	5.9
≧85	1636	100		1419	86.7		96	5.9		121	7.4
Years of education	21068
≧13	6486	100		6113	94.2		176	2.7		197	3
10~12	9035	100		8423	93.2		271	3		341	3.8
6~9	5233	100		4765	91.1		214	4.1		254	4.9
<6	143	100		126	88.1		7	4.9		10	7
Others	171	100		157	91.8		6	3.5		8	4.7
Self-rated health status	21149
Good	18268	100		172233	94.3		499	2.7		546	3
Poor	2881	100		2435	84.5		173	6		273	9.5
Marital status (currently married)	21150
Yes	15502	100		14441	93.2		463	3		598	3.9
No	5483	100		5073	92.5		201	3.7		209	3.8
Others	165	100		146	88.5		10	6.1		9	5.5
Annual equivalent income	21471
≧4 million	2200	100		2111	95.1		52	2.3		57	2.6
2 million~<4 million	7464	100		7006	93.9		228	3.1		230	3.1
<2 million	9158	100		8416	91.9		314	3.4		428	4.7
non-responsive	2629	100		2412	91.7		89	3.4		128	4.9
About people around you who to listen to your complaints
Family memebers listen to your complaints	21122
Yes	18026	100		16812	93.3		539	3		675	3.7
No	3096	100		2829	91.4		123	4		144	4.7
Neigbors or friends listen to your complaints	21122
Yes	10670	100		10007	93.8		319	3		344	3.2
No	10452	100		9634	92.2		343	3.3		475	4.5
There is no one to listen to your complaints	21122
Yes	1028	100		931	90.6		54	5.3		43	4.2
No	20094	100		18710	93.1		608	3		776	3.9
About people around you whose complaints you listen to
You listen to your family`s complaints	20987
Yes	16991	100		15874	93.4		500	2.9		617	3.6
No	3996	100		3653	91.4		161	4		182	4.6
You listen to neighboors' or friends' complaints	20987
Yes	10825	100		10180	94		316	2.9		329	3
No	10162	100		9347	92		345	3.4		470	4.6
You have no one to listen to their complaints	20987
Yes	1326	100		1183	89.2		71	5.4		72	5.4
No	19661	100		18334	93.3		590	3		727	3.7
About pople who take care of you when you fall ill
Family members take care of you	21141
Yes	19693	100		18350	93.2		601	3.1		742	3.8
No	1448	100		1303	90		68	4.7		77	5.3
Neighbors or friends take care of you	21141
Yes	1594	100		1461	91.7		54	3.4		79	5
No	19547	100		18192	93.1		615	3.1		740	3.8
There is no one who takes care of you	21141
Yes	1078	100		977	90.6		50	4.6		51	4.7
No	20063	100		18676	93.1		619	3.1		368	3.8
About people who you take care of when they fall ill
You take care of your family	21141
Yes	15687	100		14675	93.5		459	2.9		553	3.5
No	5080	100		4656	91.7		187	3.7		237	4.7
You take care of neighbors or friends	21141
Yes	1773	100		1648	92.9		51	2.9		74	4.2
No	18994	100		17683	93.1		595	3.1		716	3.8
There is no one who you take care of	21141
Yes	4600	100		4216	91.7		169	3.7		215	4.7
No	16167	100		15115	93.5		477	3		575	3.6
